# Supplementary material
Source: publisher figshare collection journal article supplement (https://tandf.figshare.com/articles/dataset/_/23179775)
Supplement: Supplementary file 1 [file 1]

Archive with 4 entries (4 files):
- zept_a_2209469_sm9689.pdf
- zept_a_2209469_sm9688.pdf
- zept_a_2209469_sm9679.pdf
- zept_a_2209469_sm9651.pdf
