# Supplementary material
Source: publisher figshare collection journal article supplement (https://tandf.figshare.com/articles/dataset/_/23179775)
Supplement: Supplementary file 1 [file 1 › zept_a_2209469_sm9688.pdf]

# Data extraction form

Record ID

\_\_\_\_\_

Study ID (surname of first author and year first full report of study was published e.g. Smith 2001)

\_\_\_\_\_

Date form completed (dd/mm/yyyy)

\_\_\_\_\_

Name/ID of person extracting data

\_\_\_\_\_

Notes

\_\_\_\_\_

## CHARACTERISTICS OF INCLUDED STUDIES

1. Author(s)  
(>5 authors write first author et al.).

\_\_\_\_\_

2. Year of publication

\_\_\_\_\_

3. Journal results was published in

\_\_\_\_\_

3. Page numbers in journal

\_\_\_\_\_

4. DOI

\_\_\_\_\_

5. Author contact details (e.g. e-mail)

\_\_\_\_\_

Notes

\_\_\_\_\_

6. Publication type

- ☐ Full report
- ☐ Brief report
- ☐ Letter
- ☐ Abstract
- ☐ Conference report
- ☐ Book chapter
- ☐ Other
- ☐ Not stated/unclear

7. Study funding details (if no funding - N/A)

\_\_\_\_\_

8. Conflict of interests (declared or noticed)

- ☐ Yes
- ☐ No

8(a). If Yes to the above - explain/describe

---

General notes for this section

---

## STUDY POPULATION AND SETTING

1. Country where study was conducted  
(include city if provided e.g. Amsterdam, The Netherlands)

---

Notes

---

2. Study population description  
(from where were participants were drawn)

---

Notes

---

3. Study setting (can include location - e.g. clinic;  
social context - e.g. resource constrained)

---

Notes

---

4. Inclusion criteria

---

Notes

---

5. Exclusion criteria

---

Notes

---

6. Recruitment methods

---

Notes

---

7. Informed obtained

- ☐ YES  
☐ NO  
☐ UNCLEAR

Notes

---

8. Was Ethics approval needed?

- ☐ YES  
☐ NO  
☐ UNCLEAR

8a. If the yes to above, was ethics approval obtained?

- ☐ YES  
☐ NO  
☐ UNCLEAR

Notes

General notes for this section

## STUDY METHODS

1. Aim(s) and objective(s) of study (e.g. feasibility, acceptability, efficacy)

Notes

2. Study design (e.g. parallel, crossover, non-RCT, mixed)

- ☐ RCT Individually-randomized parallel-group  
☐ RCT Cluster-randomized parallel-group  
☐ RCT Individually randomized cross-over (or other matched)  
☐ NON-RCT Pre to Post  
☐ QUALITATIVE  
☐ MIXED METHODS  
☐ OTHER

Notes

2a. If yes to randomisation above - how was this done (e.g. computerised/manually).

2b. If yes to randomisation above, what method was used (e.g. stratified, 1:1 ratio)

Notes

3. Start and end date of study

3a. If the actual start and end date of the study is not provided - the duration of the entire study

Notes

5. Duration of participation (from recruitment/enrolled to last follow-up)

Notes

6. Symptom level required for participation

- ☐ TRAUMA EXPOSED (Clinical diagnosis of PTSD made by diagnostic measure)  
☐ TRAUMA EXPOSED (Significant PTSD symptoms based on the subjective report(s))  
☐ UNCLEAR

Notes

7. Method(s) (measure(s)) used to determine trauma exposure (e.g Diagnostic assessment, subjective measures)

Notes

8. Method(s) (measure(s)) used to determine PTSD diagnostic status and/or symptoms

Notes

9. Was co-morbidity allowed?

- ☐ YES  
☐ NO  
☐ UNCLEAR

Notes

9a. Method(s) (measure(s)) used to assess for the presence and severity of comorbidity if applicable

Notes

General notes for this section

## STUDY PARITICIPANTS

1. Study sample  
 (Total no. randomised/total no. at start of study for non-RCTs)

1a. Clusters - if applicable, no., type, no. people per cluster)

Notes for above (can include quotes from the text, location in the text and reviewer explanations)

2. Baseline imbalances identified/present/addressed (for non-RCTs write N/A)

- ☐ YES  
☐ NO  
☐ UNCLEAR

2a. If yes/unclear to above, provide further information

Notes for above (can include quotes from the text, location in the text and reviewer explanations)

\_\_\_\_\_

3. Withdrawals and/or exclusions made during study procedures (either by the research staff of participants) (e.g adverse events, concerns etc).

- ☐ YES  
☐ NO  
☐ UNCLEAR

3a. If yes to the above, provide further information

- ☐ YES  
☐ NO  
☐ UNCLEAR

Notes for above (can include quotes from the text, location in the text and reviewer explanations)

\_\_\_\_\_

4. Age  
(e.g. 24 to 64 years (M=:46.3; SD=13.82).

\_\_\_\_\_

Notes for above (can include quotes from the text, location in the text and reviewer explanations)

\_\_\_\_\_

5. Sex

\_\_\_\_\_

Notes for above (can include quotes from the text, location in the text and reviewer explanations)

\_\_\_\_\_

6. Race/Ethnicity

\_\_\_\_\_

Notes for above (can include quotes from the text, location in the text and reviewer explanations)

\_\_\_\_\_

7. Severity of illness (PTSD mild, moderate, severe, subthreshold, trauma exposed)

\_\_\_\_\_

Notes for above (can include quotes from the text, location in the text and reviewer explanations)

\_\_\_\_\_

8. Co-morbidities

\_\_\_\_\_

Notes for above (can include quotes from the text, location in the text and reviewer explanations)

\_\_\_\_\_

9. Other treatment received  
(additional to study intervention)

\_\_\_\_\_

Notes for above (can include quotes from the text, location in the text and reviewer explanations)

\_\_\_\_\_

10. Other relevant sociodemographics

\_\_\_\_\_

Notes for above (can include quotes from the text, location in the text and reviewer explanations)

\_\_\_\_\_

General notes for this section

---

## INTERVENTION(S)

1. What PTSD Coach platform was evaluated

- ☐ PTSD Coach Mobile Application  
☐ PTSD Coach Online Web-based  
☐ Both

Notes for above (can include quotes from the text, location in the text and reviewer explanations)

---

2. Number of study groups/arms

---

Notes for above (can include quotes from the text, location in the text and reviewer explanations)

---

3. Description of intervention groups as noted in manuscript - e.g. Self Managed PTSD Coach (SM PTSD Coach) enhanced treatment as usual. For non-RCT studies, provide the pre-intervention/baseline group description).

---

3a. Number allocated to each group (e.g. PTSD Coach = 80, eTAU= 80 / PTSD Coach = 80).

---

Notes for above (can include quotes from the text, location in the text and reviewer explanations)

---

4. Duration of intervention/treatment/participation period

---

Notes for above (can include quotes from the text, location in the text and reviewer explanations)

---

5. Timing (e.g. frequency, duration of each visit/contact)

---

Notes for above (can include quotes from the text, location in the text and reviewer explanations)

---

6. Delivery (e.g. in person, virtual, telephonic)

---

Notes for above (can include quotes from the text, location in the text and reviewer explanations)

---

7. Compliance (Integrity/fidelity of intervention delivery) (Integrity/fidelity of intervention delivery for participants) if applicable

---

Notes for above (can include quotes from the text, location in the text and reviewer explanations)

---

8. Providers/people involved in intervention (e.g. profession, training etc.)

---

Notes for above (can include quotes from the text, location in the text and reviewer explanations)

---

9. Resource requirements to replicate intervention (e.g. staff numbers, costs / technology)

---

Notes for above (can include quotes from the text, location in the text and reviewer explanations)

---

10. Any other information relevant to intervention

---

General notes for this section

---

### QUANTITATIVE OUTCOME(S)

1. Outcome name(s) reported on at follow-ups (e.g. PCL-5; DASS-21; CAPS-5)

---

2. Outcome definition (subjective report / diagnostics / qualitative) (e.g. PCL-5 = Subj report; CAPS-5 = Diagnostic)

---

Notes for above (can include quotes from the text, location in the text and reviewer explanations)

---

3. Is the outcome measure(s) validated?

- ☐ YES  
☐ NO  
☐ UNCLEAR

Notes for above (can include quotes from the text, location in the text and reviewer explanations)

---

4. Time points that the outcome(s) was assessed (e.g. Baseline, 4 weeks etc)

---

Notes for above (can include quotes from the text, location in the text and reviewer explanations)

---

5. Time points outcome(s) reported on (e.g. pre- and post intervention at 8 weeks)

---

Notes for above (can include quotes from the text, location in the text and reviewer explanations)

---

6. Person measuring/assessing or reporting outcome(s)

---

Notes for above (can include quotes from the text, location in the text and reviewer explanations)

---

General notes

---

## QUANTITATIVE RESULTS

1. Statistical methods used for analysis

---

1a. Appropriateness of these methods

- ☐ APPROPRIATE  
☐ NOT APPROPRIATE  
☐ UNCLEAR/UNSURE

Notes for above (can include quotes from the text, location in the text and reviewer explanations)

---

1b. Confounding factors/ effect modifiers accounted for in the analyses

- ☐ YES  
☐ NO  
☐ UNCLEAR

Notes for above (can include quotes from the text, location in the text and reviewer explanations)

---

1c. Was reanalysis required?  
(specify why if yes)

- ☐ YES  
☐ NO  
☐ UNCLEAR

Notes for above (can include quotes from the text, location in the text and reviewer explanations)

---

2. N per group(s) at follow-up  
(e.g. PTSD Coach = 60 and etau = 50)  
(if more than one time follow-up timepoint extract for each time point)

---

Notes for above (can include quotes from the text, location in the text and reviewer explanations)

---

4. Reason(s) provided for attrition (lost to follow-up / withdraw etc).

---

Notes for above (can include quotes from the text, location in the text and reviewer explanations)

---

3. Attrition rate(s) reported (either percentage reported or self calculated)

---

Notes for above (can include quotes from the text, location in the text and reviewer explanations)

---

5. Reported data M/SD (e.g. (PTSD Coach-CS: M=3.4; SD=0.55 and PTSD Coach-SM: M=2.33; SD=0.58.)

---

5a. Note if other variance/results such as effect sizes are provided (e.g. Effect sizes provided in Table 2 on page 5).

---

Notes for above (can include quotes from the text, location in the text and reviewer explanations)

6. Any other relevant quantitative data / comments / notes

Notes for above (can include quotes from the text, location in the text and reviewer explanations)

#### QUALITATIVE OUTCOME(S)

1. How was qualitative data collected (structured or unstructured interviews, how many interviews, length of interviews, individuals or group interviews, face to face or telephonic interviews)(all information provided regarding of collecting this data

2. How many interviews / data sources (e.g. 10 interviews) were aimed to be collected/started with

3. Time point(s) of collection

4. Person(s) collecting outcome(s)

5. Any other relevant qualitative data notes

#### QUALITATIVE RESULTS

1. Statistical methods used for analysis

1a. Appropriateness of these methods

- ☐ APPROPRIATE  
☐ NOT APPROPRIATE  
☐ UNCLEAR/UNSURE

Notes for above (can include quotes from the text, location in the text and reviewer explanations)

1b. Confounding factors/ effect modifiers accounted for in the analyses

- ☐ YES  
☐ NO  
☐ UNCLEAR

Notes for above (can include quotes from the text, location in the text and reviewer explanations)

1c. Was reanalysis required?  
(specify why if yes)

- ☐ YES  
☐ NO  
☐ UNCLEAR

Notes for above (can include quotes from the text, location in the text and reviewer explanations)

2. How many data sources (e.g. interviews) analysed

---

3. Reasons for discrepancy between aimed number of data sources (e.g. interviews) and actual analysed

---

4. Author derived themes (all information documented in manuscript)

(1. ....)

(2. ....)

---

6. Any other relevant quantitative data / comments / notes

---

## APPLICABILITY

1. Have important populations been excluded from the study?

- ☐ YES  
☐ NO  
☐ UNCLEAR

Notes for above (can include quotes from the text, location in the text and reviewer explanations)

---

2. Does the study directly address the research question?

- ☐ YES  
☐ NO  
☐ UNCLEAR

Notes for above (can include quotes from the text, location in the text and reviewer explanations)

---

## OTHER INFORMATION

1. Key conclusions of study authors

---

2. Study limitations

---

3. Recommendations for future studies

---

4. Correspondence required for further study results information

- ☐ YES  
☐ NO  
☐ UNCLEAR

Notes for above (can include quotes from the text, location in the text and reviewer explanations)

---

5. Further study information requested (from whom, what and when)

Notes for above (can include quotes from the text, location in the text and reviewer explanations)

---

6. Correspondence received (from whom, what and when)

---

---

Notes for above (can include quotes from the text,  
location in the text and reviewer explanations)

---
