# Supplementary material
Source: publisher figshare collection journal article supplement (https://tandf.figshare.com/articles/dataset/_/23179775)
Supplement: Supplementary file 1 [file 1 › zept_a_2209469_sm9689.pdf]

# Eligibility form

Record ID

\_\_\_\_\_

Study ID:

(surname, first name of the main author, and  
publication year - e.g. Van der Meer, 2011)

\_\_\_\_\_

Reviewer initials

\_\_\_\_\_

Date form completed

\_\_\_\_\_

## STUDY DESIGN

1. The study is a quantitative, qualitative, or mixed  
methods primary research study reporting on the  
feasibility, acceptability, and/or effectiveness of  
PTSD Coach (web-based or mobile application) as  
treatment or prevention?

- ☐ Yes  
☐ No  
☐ Unclear

Notes

\_\_\_\_\_

## PARTICIPANTS / POPULATION

2. The study is in participants of all ages that focus  
on PTSD Coach (web-based or mobile application) ?

- ☐ Yes  
☐ No  
☐ Unclear

Notes

\_\_\_\_\_

3. The study includes trauma-exposed individuals?  
(fulfilling DSM/ICD criteria)

- ☐ yes  
☐ No  
☐ Unclear

Notes

\_\_\_\_\_

## INTERVENTION

4. The study evaluates PTSD Coach (web-based or mobile  
application) as an intervention?

- ☐ Yes  
☐ No  
☐ Unclear

Notes

\_\_\_\_\_

## COMPARATOR(S)/CONSTROL ARM(S)

5. The study compares PTSD Coach (web-based or mobile application) to any comparator (i.e. treatment as usual / wait list control etc) ?

☐ Yes  
☐ No  
☐ Unclear

Notes

---

6. The study has no comparator (i.e qualitative research investigating user experience/pre to post)?

☐ Yes  
☐ No  
☐ Unclear

#### REVIEWER DECISION

7. Include in this review?  
(Answers 1 - 4 = "Yes" and 5 or 6 = "Yes")

☐ Yes  
☐ No  
☐ Unclear/Uncertain

Notes

---

8. Is additional information required from the study authors before a final assessment/decision can be made?

☐ Yes  
☐ No

Notes

---

9. If yes to the above, what information is required before a decision can be made?

---

Notes

---

#### COMPLETE AFTER BOTH PRIMARY REVIEWERS HAVE INDEPENDENTLY COMPLETED THE ELIGIBILITY REVIEW

10. Do both reviewers agree?

☐ Yes  
☐ No

Notes

---

11. In the even that there was disagreement, was this resolved through discussion?

☐ Not applicable  
☐ Yes  
☐ No

Notes

---

12. In the event that disagreement was not resolved through discussion, what was the secondary reviewer's decision?

☐ Not applicable  
☐ Include  
☐ Exclude

Notes

---

13. In summary, reason for exclusion is (if applicable) ?

Notes
